# THE AMERICAN JOURNAL OF PSYCHIATRY

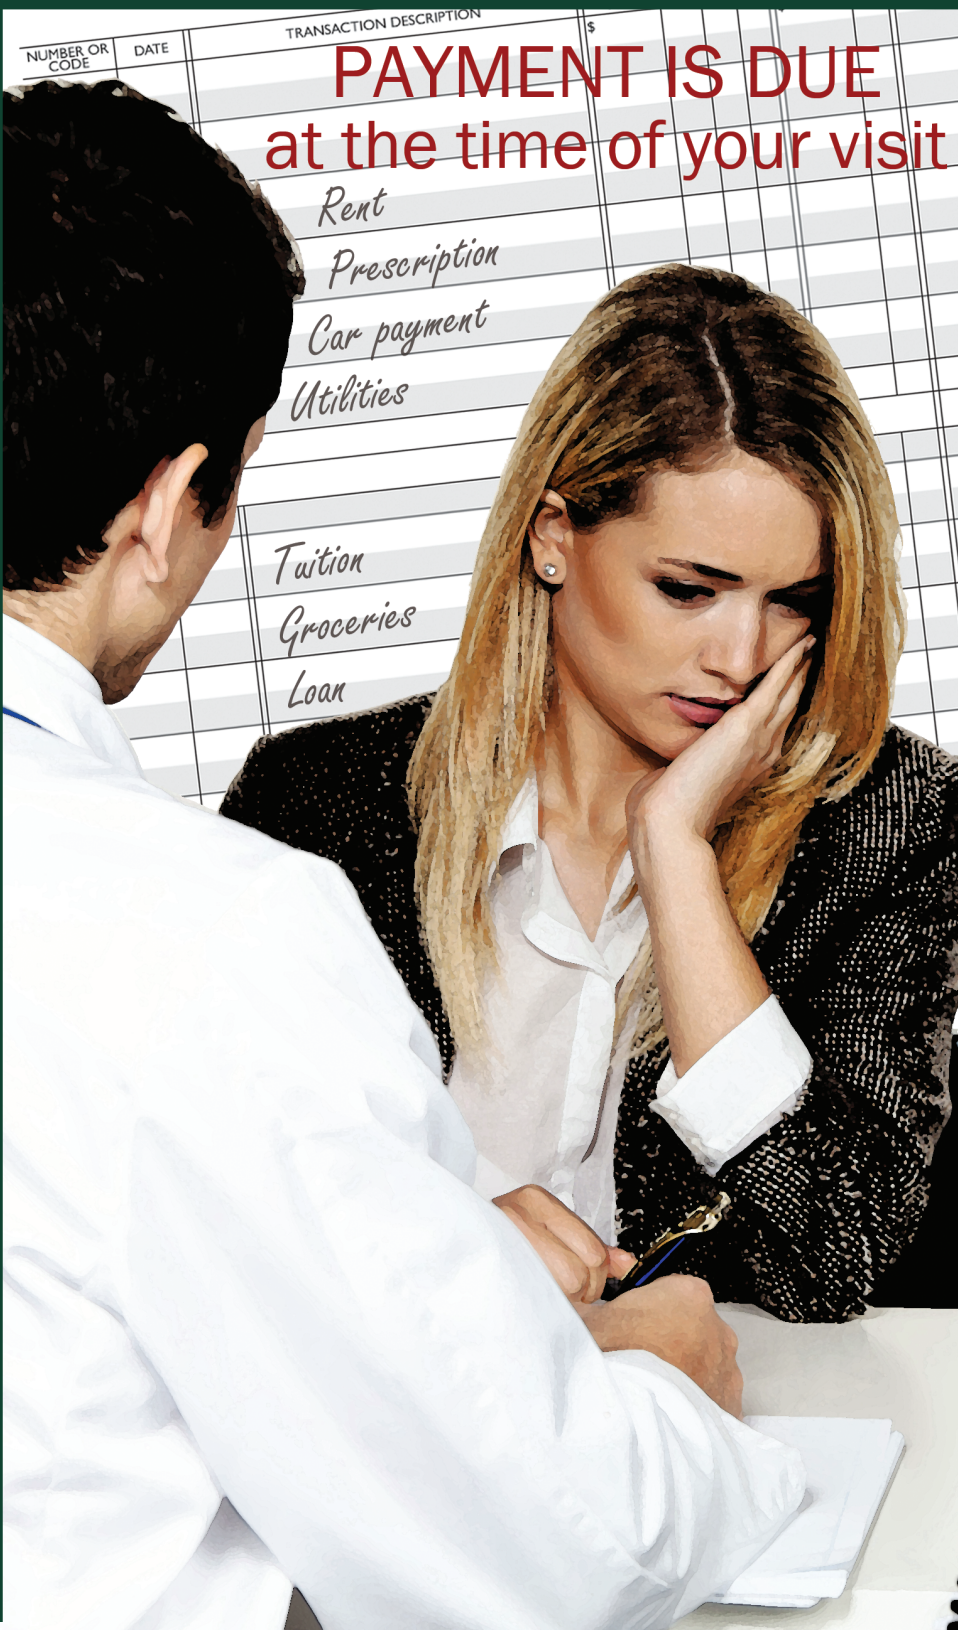

The Clinical Assessment Interview for Negative Symptoms (CAINS): Final Development and Validation  
Ann M. Kring, Ph.D., et al. 165

Prevalence, Comorbidity and Correlates of DSM-5 Proposed Disruptive Mood Dysregulation Disorder  
William E. Copeland, Ph.D., et al. 173

◀ The Effects of Mental Health Parity on Spending and Utilization for Bipolar, Major Depression, and Adjustment Disorders  
Alisa B. Busch, M.D., M.S., et al. 180

Association Between Older Age and More Successful Aging: Critical Role of Resilience and Depression  
Dilip V. Jeste, M.D., et al. 188

Continuing Medical Education 237

February 2013  
Volume 170 • Number 2

Official Journal of the  
AMERICAN PSYCHIATRIC ASSOCIATION

[ajp.psychiatryonline.org](http://ajp.psychiatryonline.org)
