# THE AMERICAN PSYCHIATRIC ASSOCIATION

1000 Wilson Blvd., Suite 1825, Arlington, VA 22209-3901  
(888) 357-7924 (toll-free inside the U.S. and Canada) / (703) 907-7300  
web site: [www.psych.org/](http://www.psych.org/) e-mail: [apa@psych.org](mailto:apa@psych.org)

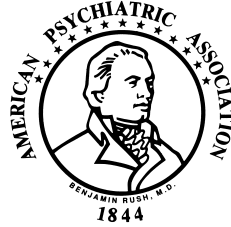

## OFFICERS 2012–2013

|                 |                            |
|-----------------|----------------------------|
| President       | Dilip V. Jeste, M.D.       |
| President-Elect | Jeffrey A. Lieberman, M.D. |
| Treasurer       | David Fassler, M.D.        |
| Secretary       | Roger Peele, M.D.          |

## ASSEMBLY

|               |                        |
|---------------|------------------------|
| Speaker       | R. Scott Benson, M.D.  |
| Speaker-Elect | Melinda L. Young, M.D. |
| Recorder      | Jenny L. Boyer, M.D.   |

## MEDICAL DIRECTOR'S OFFICE

|                          |                            |
|--------------------------|----------------------------|
| Medical Director and CEO | James H. Scully, Jr., M.D. |
|--------------------------|----------------------------|

## BOARD OF TRUSTEES

|                          |                            |
|--------------------------|----------------------------|
| Jeffrey Akaka, M.D.      | Judith F. Kashtan, M.D.    |
| Carol A. Bernstein, M.D. | Molly K. McVoy, M.D.       |
| Brian Crowley, M.D.      | James E. Ninninger, M.D.   |
| Jeffrey Geller, M.D.     | John M. Oldham, M.D.       |
| Marc David Graff, M.D.   | Alan F. Schatzberg, M.D.   |
| James A. Greene, M.D.    | Alik S. Widge, M.D., Ph.D. |

## PUBLISHER

Rebecca D. Rinehart

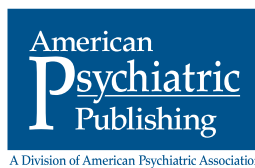

The American Journal of Psychiatry is online at [ajp.psychiatryonline.org](http://ajp.psychiatryonline.org)

THE AMERICAN PSYCHIATRIC ASSOCIATION  
Chairpersons of Councils, Commissions, Committees, and Task Forces

Standing Committees

**Bylaws**

Eric M. Plakun, M.D.

**Elections**

Robert E. Kelly, Jr., M.D.

**Ethics**

Richard D. Milone, M.D.

**Finance and Budget**

Frank W. Brown, M.D.

*Audit*

David Fassler, M.D.

*Investment Oversight*

Larry R. Faulkner, M.D.

**Joint Reference**

Jeffrey A. Lieberman, M.D.

**Membership**

Joseph Ezra V. Rubin, M.D.

**Nominating**

John M. Oldham, M.D.

**Tellers**

Tanya Nayyirah Alim, M.D.

**Council on Addiction Psychiatry**

John A. Renner, M.D.

**Council on Advocacy and Government Relations**

Robert Paul Cabaj, M.D.

*Advocacy and Litigation Funding*

Renee L. Binder, M.D.

**Council on Children, Adolescents, and Their Families**

Louis J. Kraus, M.D.

*Agnes Purcell McGavin Award*

*Blanche F. Ittleson Research Award*

Karen Dineen Wagner, M.D.

**Council on Communications**

Jeffrey A. Borenstein, M.D.

**Council on Geriatric Psychiatry**

Brent P. Forester, M.D.

**Council on Healthcare Systems and Financing**

Sul Ross Olen Thorward, M.D.

*Reimbursement for Psychiatric Care*

Bruce J. Schwartz, M.D.

*RBRVS, Codes and Reimbursement*

Ronald M. Burd, M.D.

**Council on Medical Education and Lifelong Learning**

Sandra Sexson, M.D.

*APA Public Psychiatry Fellowship Selection Committee*

Stephen M. Goldfinger, M.D.

*APA/SAMHSA Minority Fellowship Selection and Advisory*

Toi B. Harris, M.D.

*Scientific Program*

Joseph A. Cheong, M.D.

*Scientific Program Committee of the Institute on Psychiatric Services*

David Alan Pollack, M.D.

*Task Force to Update the Ethics Annotations*

Laura W. Roberts, M.D.

*Vestermark Award Committee*

Frederick G. Guggenheim, M.D.

**Council on Minority Health and Health Disparities**

Sandra C. Walker, M.D.

**Council on Psychiatry And Law**

Patricia R. Recupero, M.D., J.D.

*Isaac Ray/Human Rights Award*

Steven K. Hoge, M.D.

*Judicial Action*

Paul S. Appelbaum, M.D.

*Manfred S. Guttmacher Award*

Rebecca W. Brendel, M.D., J.D.

**Council on Psychosomatic Medicine  
(Consultation Liaison Psychiatry)**

Joel E. Dimsdale, M.D.

**Council on Research and Quality Care**

Joel Yager, M.D.

*Electronic Health Records*

Steven Roy Daviss, M.D.

*Psychiatric Dimensions of Disasters*

Robert J. Ursano, M.D.

*Research Awards*

Lewis L. Judd, M.D.

*Steering Committee on Practice Guidelines*

Joel Yager, M.D.

*Task Force on DSM-V*

David J. Kupfer, M.D.

*Task Force to Revise the Practice of Electroconvulsive Therapy*

Sarah H. Lisanby, M.D.

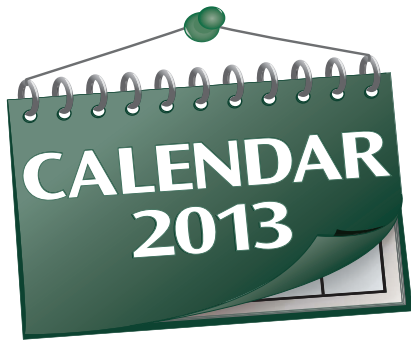

For free listing of your organization's official annual or regional meeting, please send us the following information: sponsor, location, inclusive dates, type and number of continuing education credits (if available), and the name, address, and telephone number of the person or group to contact for more information. In order for an event to appear in our listing, all notices and changes must be received at least 6 months in advance of the meeting and should be addressed to:

*Calendar, American Journal of Psychiatry, 1000 Wilson Boulevard, Suite 1825, Arlington, VA 22209-3901, [swestrade@psych.org](mailto:swestrade@psych.org) (e-mail).*

*Because of space limitations, only listings of meetings of the greatest interest to Journal readers may be included.*

---

## FEBRUARY

**February 13-17**, 18th Annual Psychopharmacology Update, Nevada Psychiatric Association (district branch of APA), Paris Las Vegas Hotel, Las Vegas, NV. Contact: (877) 493-0007 (tel); [conference@nvpsychiatry.org](mailto:conference@nvpsychiatry.org) (email); [www.nvpsychiatry.org](http://www.nvpsychiatry.org) (web site).

---

## MARCH

**March 7-9**, 42nd Annual Meeting, American Association of Directors of Psychiatric Residency Training, Ft. Lauderdale, Fla. [www.aadprt.org](http://www.aadprt.org) (web site).

---

## APRIL

**April 3-6**, 24th Annual Meeting, American Neuropsychiatric Association, Boston, Mass. Contact: American Neuropsychiatric Association, 700 Ackerman Rd., Suite 625, Co-

lumbus, OH 43202; (614) 447-2077 (tel); e-mail: [anpa@osu.edu](mailto:anpa@osu.edu); [www.anpaonline.org](http://www.anpaonline.org) (web site).

---

## MAY

**May 18-22**, 166th Annual Meeting, American Psychiatric Association, San Francisco, Calif. Contact: APA Annual Meetings Dept., 1000 Wilson Blvd, Suite 1825, Arlington, VA 22209; (703) 907-7815 (tel); <http://www.psych.org/learn/annual-meeting> (web site).

---

## JUNE

**June 6-9**, 4th World Congress on ADHD: From Childhood to Adult Disease, Milan, Italy. Contact: Congress Organizer, +49-40-670 88 20 (tel); [adhd2013@cpo-hanser.de](mailto:adhd2013@cpo-hanser.de) (email); [www.adhd-congress.org](http://www.adhd-congress.org) (web site).

**June 20-22**, Association of Directors of Medical Student Education in Psychiatry meeting, Williamsburg Lodge, Williamsburg, Va. For registra-

tion information, go to [http://www.admsep.org/upcoming\\_meeting.php](http://www.admsep.org/upcoming_meeting.php).

---

## JULY

**July 8-13**, 28th International Congress of Applied Psychology, Palais des Congrès de Paris, France. Contact: [exh@icap2014.com](mailto:exh@icap2014.com) (email); [www.icap2014.com](http://www.icap2014.com) (web site).

---

## SEPTEMBER

**September 25-27**, 9th Congress of the International Neuropsychiatric Association, Chicago, Ill. [www.inawebsite.org](http://www.inawebsite.org) (web site).

---

## OCTOBER

**October 10-13**, 65th Institute on Psychiatric Services, Philadelphia, Pa. Contact: APA Annual Meetings Dept., 1000 Wilson Blvd, Suite 1825, Arlington, VA 22209; <http://www.psychiatry.org/learn/institute-on-psychiatric-services> (web site).

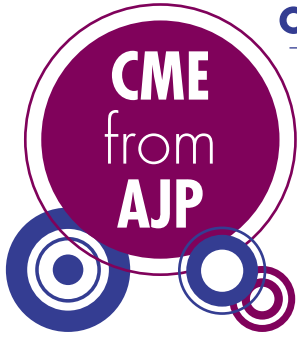

## Continuing Medical Education

Three articles in this issue form the basis of a short course with questions that can be answered for up to 1 *AMA PRA Category 1 Credit™* each by visiting <http://psychiatryonline.org/cme.aspx> and clicking on the “American Journal of Psychiatry” tab.

CME credit is issued only online, and a paid subscription to the AJP CME course program is required.

This month's courses appear on pages 237–240.

FREE AUDIO!

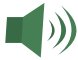

### Have You Heard?

You can listen to highlights of *The American Journal of Psychiatry* by downloading a monthly free .mp3 audio file from our web site (<http://ajp.psychiatryonline.org/audio.aspx#>) or by subscribing to the AJP Audio podcast at iTunes or other feed reader. Presented by Deputy Editor Dr. Susan Schultz or by Executive Editor Michael Roy, each month's audio lasts approximately 30 minutes and covers several research articles, the Treatment in Psychiatry feature, and one or two editorials.

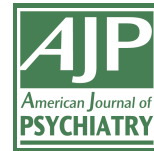

Coming in the March 2013 issue\*

## THE AMERICAN JOURNAL OF PSYCHIATRY

### Perinatal Choline Effects on Neonatal Pathophysiology Related to Later Schizophrenia Risk

R.G. Ross, S.K. Hunter, L. McCarthy, J. Beuler, A.K. Hutchison, B.D. Wagner, S. Leonard, K.E. Stevens, and R. Freedman

### Nonpharmacological Interventions for ADHD: Systematic Review and Meta-Analyses of Randomized Controlled Trials of Dietary and Psychological Treatment

E.J.S. Sonuga-Barke, D. Brandeis, S. Cortese, D. Daley, M. Ferrin, M. Holtmann, J. Stevenson, M. Danckaerts, S. van der Oord, M. Döpfner, R.W. Dittmann, E. Simonoff, A. Zuddas, T. Banaschewski, J. Buitelaar, D. Coghill, C. Hollis, E. Konofal, M. Lecendreux, I.C.K. Wong, and J. Sergeant

### Comorbidities and Mortality in Persons With Schizophrenia: A Swedish National Cohort Study

C. Crump, M.A. Winkleby, K. Sundquist, and J. Sundquist

### SSRI Use During Pregnancy and Risk of Stillbirth and Neonatal Mortality

E. Jimenez-Solem, J.T. Andersen, M. Petersen, K. Broedbaek, A.R. Lander, S. Afzal, C. Torp-Pedersen, and H.E. Poulsen

\*Can't wait? Visit [ajp.psychiatryonline.org/AJPinAdvance.aspx](http://ajp.psychiatryonline.org/AJPinAdvance.aspx) to see all articles uploaded in advance of print!

# The Residents' JOURNAL

*The Residents' JOURNAL* a publication of  
The American Journal of Psychiatry

December 2012 Volume 7 Issue 12

**Inside**

- 2 **2012 Residents' Journal Editor's Choice**  
Monifa Seawell, M.D.
- 3 **Immigration and Mental Health in Adolescents**  
Nicole Zuber, M.D.
- 6 **Acute Alcohol Withdrawal**  
Dylan P. Murray, M.D.
- 8 **Food-Triggered Panic Attacks**  
Chris A. Karampahtsis, M.D., M.P.H.
- 10 **Neuroleptic Malignant Syndrome in Patients With HIV in the Emergency Department**  
Danijela Ivelja-Hill, M.D., Eileen Zhivago, M.D., Maria del Pilar Trelles-Thorne, M.D.
- 12 **Hypersexual Disorder: A Clinical Review for Psychiatry Residents**  
Iman Parhami, M.D., M.P.H.
- 15 **Bethanechol for Antidepressant-Associated Sexual Dysfunction**  
Jonathan R. Scarff, M.D.
- 17 **Upcoming Issue Themes**

**In This Issue**



We conclude the year 2012 at the *Residents' Journal* with a variety of topics. Editor-in-Chief Monifa Seawell, M.D., begins with an editorial on this year's recipient of the *Residents' Journal* Editor's Choice award. Nicole Zuber, M.D., discusses the cultural and bicultural challenges involved in treating adolescent immigrants at risk for suicidal behaviors. Dylan P. Murray, M.D., presents a case report of acute alcohol withdrawal syndrome. Chris A. Karampahtsis, M.D., M.P.H., presents a case of a young woman with food-triggered panic attacks. Danijela Ivelja-Hill, M.D., Eileen Zhivago, M.D., and Maria del Pilar Trelles-Thorne, M.D., discuss the importance of early recognition of neuroleptic malignant syndrome, particularly in vulnerable populations. Iman Parhami, M.D., M.P.H., provides a clinical review of hypersexual disorder. Last, Jonathan R. Scarff, M.D., discusses bethanechol as treatment for antidepressant-associated sexual dysfunction.

**Editor-in-Chief:**  
Monifa Seawell, M.D.

**Senior Editor:**  
Sarah M. Fayad, M.D.

**Associate Editor:**  
Arshya Vahabzadeh, M.D.

**Editors Emeriti:**  
Sarah B. Johnson, M.D.  
Molly McVoy, M.D.  
Joseph M. Cerimele, M.D.

**Staff Editor:**  
Angela Moore

The Residents' Journal accepts manuscripts authored by medical students, resident physicians, and fellows. To submit your paper, please visit the manuscript submission site at [mc.manuscriptcentral.com/appi-ajp](http://mc.manuscriptcentral.com/appi-ajp) and either create an account or use your existing account. For manuscript type, select "Residents." Then follow the instructions to upload your manuscript. Residents who are interested in participating as Guest Section Editors should e-mail the Residents' Journal Editor-in-Chief Monifa Seawell at [mseawell@med.wayne.edu](mailto:mseawell@med.wayne.edu).

See the September 2010 issue for details on the new peer review process.

The Residents' Journal is sent free-of-charge to all psychiatry residents. Anyone interested in being included on the distribution list should contact Angela Moore, the Residents' Journal staff editor at [ajp@psych.org](mailto:ajp@psych.org) with "Subscribe to Residents' Journal" in the subject line.

## Contents

- A1 Editorial Board  
A3 Highlights of this issue

## Editorials

- 1 **Genome-wide association studies in psychiatry: what have we learned?**  
A. L. Collins and P. F. Sullivan

- 4 **Karl Jaspers – reflection**  
Andrew Sims

- 5 **Structural and copy number variants in the human genome: implications for psychiatry**  
D. St Clair

- 7 **Hypochondriasis and health anxiety: conceptual challenges**  
V. Starcevic

## Reappraisal

- 9 **Should psychiatrists be prescribing oestrogen therapy to their female patients?**  
M. C. Craig

- 13 **Wilhelmina and Manfreda at the Balcony (XIII century) – poem**  
Dino Campana

## Review articles

- 14 **Natural history, predictors and outcomes of depression after stroke: systematic review and meta-analysis**  
L. Ayerbe, S. Ayis, C. D. A. Wolfe and A. G. Rudd
- 22 **Differential mortality rates in major and subthreshold depression: meta-analysis of studies that measured both**  
P. Cuijpers, N. Vogelzangs, J. Twisk, A. Kleiboer, J. Li and B. W. Penninx

## Papers

- 28 **Service quality and clinical outcomes: an example from mental health rehabilitation services in England**  
H. Killaspy, L. Marston, R. Z. Omar, N. Green, I. Harrison, M. Lean, F. Holloway, T. Craig, G. Leavey and M. King

- 34 **Neuroanatomy – poems by doctors**  
Miles Burrows

- 35 **Cost-effectiveness of early intervention in first-episode psychosis: economic evaluation of a randomised controlled trial (the OPUS study)**  
L. H. Hastrup, C. Kronborg, M. Bertelsen, P. Jeppesen, P. Jorgensen, L. Petersen, A. Thorup, E. Simonsen and M. Nordentoft

- 41 **How do antidepressants work? – in 100 words**  
Ian M. Anderson

- 42 **Drop out from out-patient mental healthcare in the World Health Organization's World Mental Health Survey initiative**  
J. E. Wells, M. Oakley Browne, S. Aguilar-Gaxiola, A. Al-Hamzawi, J. Alonso, M. C. Angermeyer, C. Bouzan, R. Bruffaerts, B. Bunting, J. M. Caldas-de-Almeida, G. de Girolamo, R. de Graaf, S. Florescu, A. Fukao, O. Gureje, H. R. Hinkov, C. Hu, I. Hwang, E. G. Karam, S. Kostyuchenko, V. Kovess-Masfety, D. Levinson, Z. Liu, M. E. Medina-Mora, S. H. Nizamie, J. Posada-Villa, N. A. Sampson, D. J. Stein, M. C. Viana and R. C. Kessler

- 50 **Schizophrenia severity, social functioning and hippocampal neuroanatomy: three-dimensional mapping study**  
P. Brambilla, C. Perlini, P. Rajagopalan, P. Saharan, G. Rambaldelli, M. Bellani, N. Dusi, R. Cerini, R. Pozzi Mucelli, M. Tansella and P. M. Thompson

- 56 **Health anxiety in Australia: prevalence, comorbidity, disability and service use**  
M. Sunderland, J. M. Newby and G. Andrews

- 62 **Change in anxiety following successful and unsuccessful attempts at smoking cessation: cohort study**  
M. S. McDermott, T. M. Marteau, G. J. Hollands, M. Hankins and P. Aveyard

- 68 **Religion, Spirituality and mental health: results from a national study of English households**  
M. King, L. Marston, S. McManus, T. Brugha, H. Meltzer and P. Bebbington

## Columns

- 74 **Correspondence**  
77 **Book reviews**  
78 **Contents of *Advances in Psychiatric Treatment***  
79 **Contents of the *American Journal of Psychiatry***  
80 **From the Editor's desk**

## Cover picture

*Pictures*, 2004 by Mati Garcia-Monzon (b. 1944)

Mati Garcia-Monzon was born in Spain and started painting during her childhood in Cadiz. Her CV includes national and international exhibitions, and also illustrations in books and magazines. In 2004 a relative of Mati had a stroke and since then she spends time caring for her. During the first year after the stroke, Mati drew a number of pictures related to this experience. They show a deconstructed reality where some elements are missing and others have changed their shape or size. Despite the abstracted forms there is strong sense of shared physicality. Is this the reality of life after stroke as seen through the eyes of a carer?

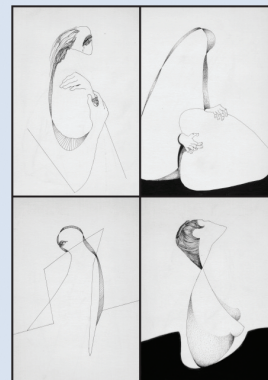

Dr Luis Ayerbe

We are always looking for interesting and visually appealing images for the cover of the *Journal* and would welcome suggestions or pictures, which should be sent to Dr Allan Beveridge, British Journal of Psychiatry, 17 Belgrave Square, London SW1X 8PG, UK or [bjp@rcpsych.ac.uk](mailto:bjp@rcpsych.ac.uk).

# The American Journal of PSYCHIATRY

Latest  
IMPACT  
FACTOR  
12.539!

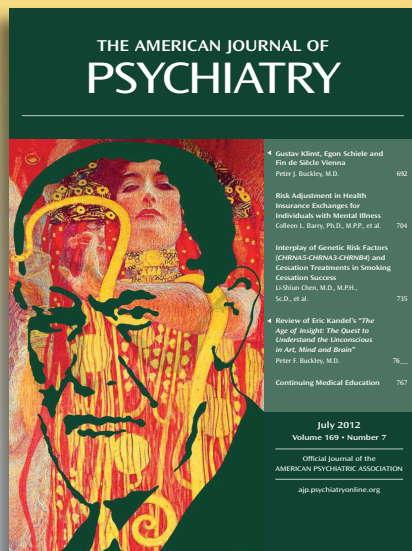

Official Journal of the  
American Psychiatric Association

Edited by Robert Freedman, M.D.

- The *American Journal of Psychiatry* has an Impact Factor of 12.539 according to the recently released 2011 Journal Citation Reports® (Thomson Reuters, 2012), placing it 2nd among the 129 journals in psychiatry while still remaining the far-and-away leader in total citations.

- The *American Journal of Psychiatry* (AJP) is also the #2 journal in psychiatry in terms of immediacy according to Thomson Scientific's Immediacy Index. This important performance metric is calculated by dividing the number of citations to articles published in a given year by the number of articles published in that year.

- The Immediacy Index is a good measure of how quickly a given journal's articles are cited. AJP's #2 placement is a result of publishing articles that are relevant, covering current "hot" topics and cutting-edge research, and getting these findings to the field faster with AJP in Advance, the Journal's online-ahead-of-print publication protocol.

- A recent poll conducted by the BioMedical & Life Sciences Division of The Special Libraries Association identified the 100 most influential journals in all of Biology & Medicine over the last 100 years. *The American Journal of Psychiatry* was among those honored, the only psychiatry/psychology journal represented.

No other psychiatric journal reaches more psychiatrists with greater impact or immediacy than the one the overwhelming majority of psychiatrists considers essential: AJP.

ISSN 0002-953X • [ajp.psychiatryonline.org](http://ajp.psychiatryonline.org)

To order a subscription, visit [www.appi.org](http://www.appi.org).

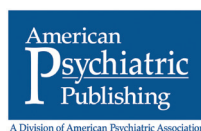

The *First* and *Last* Word in Psychiatry

[www.appi.org](http://www.appi.org) • 1-800-368-5777 • 703-907-7322

Find us on [facebook](#) and [twitter](#) Priority Code AH1246
