# THE AMERICAN JOURNAL OF PSYCHIATRY

## En este número

A12

### Perspectivas

#### Editoriales

- 133** La entrevista de evaluación clínica de los síntomas negativos (CAINS): Avances teóricos y prácticos en la evaluación de los síntomas negativos en esquizofrenia  
Deanna M. Barch **Audio**
- 136** Poniendo a prueba el diagnóstico de trastorno de desregulación disruptiva del ánimo  
David Axelson **Audio**
- 140** Paridad: Un reto y una posibilidad de investigación constantes  
Dennis McCarty
- 143** Uno es sólo tan viejo como cree ser  
Francine Grodstein

#### Tratamiento en Psiquiatría

- 146** El papel de la clozapina en el tratamiento del primer episodio de esquizofrenia  
Gary Remington, Ofer Agid, George Foussias, Margaret Hahn, Naren Rao, y Mark Sinyor  
**Audio** **Guías clínicas**

#### Imágenes en Psiquiatría

- 152** Los leones del Maristán de Granada  
Jesús Pérez, Fernando Girón-Irueste, Manuel Gurpegui, Ross J. Baldessarini, y Jose de Leon

#### Resúmenes y Reseñas

- 154** Evidencia de un componente genético para la dependencia de sustancias en nativos americanos  
Cindy L. Ehlers y Ian R. Gizer

### Nuevas investigaciones

#### Artículos

- 165** La entrevista de evaluación clínica de los síntomas negativos (CAINS): Versión definitiva y validación  
Ann M. Kring, Raquel E. Gur, Jack J. Blanchard, William P. Horan, y Steven P. Reise  
**Audio** **Editorial** **Guías clínicas**

- 173** Prevalencia, comorbilidad y correlatos del trastorno de desregulación disruptiva del ánimo propuesto en el DSM-5  
William E. Copeland, Adrian Angold, E. Jane Costello, y Helen Egger **Audio** **Editorial**
- 180** Los efectos de la paridad de salud mental en los gastos y el uso para los trastornos bipolar, depresivo mayor y de adaptación  
Alisa B. Busch, Frank Yoon, Colleen L. Barry, Vanessa Azzone, Sharon-Lise T. Normand, Howard H. Goldman, y Haiden A. Huskamp **Audio** **Editorial**
- 188** Asociación entre la edad adulta y un mejor envejecimiento: el papel crítico de la resiliencia y la depresión  
Dilip V. Jeste, Gauri N. Savla, Wesley K. Thompson, Ipsit V. Vahia, Danielle K. Glorioso, A'verria Sirkin Martin, Barton W. Palmer, David Rock, Shahrokh Golshan, Helena C. Kraemer, y Colin A. Depp  
**Audio** **Editorial** **EMC**
- 197** Relaciones entre los cambios sostenidos en la conectividad fronto-estriatal y el afecto positivo en depresión mayor resultante del tratamiento antidepresivo  
Aaron S. Heller, Tom Johnstone, Sharee N. Light, Michael J. Peterson, Gregory G. Kolden, Ned H. Kalin, y Richard J. Davidson
- 207** Variación genética común y eficacia del tratamiento en tratamiento del trastorno depresivo mayor: Un meta análisis de tres estudios farmacogenéticos de genoma completo  
GENDEP Investigators, MARS Investigators, y STAR\*D Investigators **EMC**
- 218** ¿Mejora una intervención de calidad de vida en trastornos de ansiedad, los desenlaces clínicos en los pacientes con ingresos más bajos?  
Greer Sullivan, Cathy Sherbourne, Denise A. Chavira, Michelle G. Craske, Daniela Gollineli, Xiaotong Han, Raphael D. Rose, Alexander Bystritsky, Murray B. Stein, y Peter Roy-Byrne **EMC**

### Comunicados y actualizaciones

#### Cartas al Editor

- 226** Un nuevo estimulante de abuso: 5-(2-aminopropil) indole  
Recordando a Martin Luther King: El efecto de Obama en la memoria
- 227** **Corrections**

## Otros temas de interés

- 228 Actos Oficiales
- 237 Educación médica Continuada
- A6 Directivos de la American Psychiatric Association
- A8 Calendario
- A11 Contenidos del *British Journal of Psychiatry*

## Cubierta

Busch et al. (p. 180) reportan que luego de implementar la paridad en los seguros de salud mental para los trastornos de abuso de sustancias, se redujeron los gastos personales (de su propio bolsillo) de personas con trastorno bipolar, depresión mayor y trastorno de adaptación vinculadas al Federal Employees Health Benefits Program [Programa de beneficios de salud de los empleados]. Diseño de la cubierta de Susan Westrate.

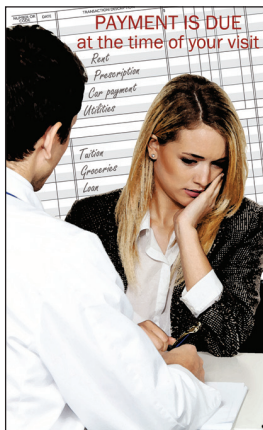

## Audio

artículo en AJP Audio: archivo .mp3 descargable de [ajp.psychiatryonline.org](http://ajp.psychiatryonline.org)

## Guías clínicas

este artículo ofrece guías clínicas (ver pagina “En este Número” o al final del artículo)

## EMC

existe un curso en línea que cubre los contenidos de este artículo para los suscriptores del programa de cursos de EMC del AJP

## Editorial

este artículo se discute en uno de los editoriales de este numero

This issue's Spanish Table of Contents is presented in collaboration with the Office of Global Health, UMDNJ-Robert Wood Johnson Medical School

Translation courtesy of  
Sergi Casals, M.S.

*Garuna Editors (www.garunaeditors.com), Barcelona, Spain*

Carlos Lopez Jaramillo, M.D.  
*Universidad de Antioquia, Medellin, Colombia*

and

Javier I. Escobar, M.D., M.Sc.  
*UMDNJ-Robert Wood Johnson Medical School*
